# Supplementary material for: Allocation of National Institutes of Health Funding by Disease Category in 2008 and 2019
Source: PubMed Central journal article supplement (PMC7841468; doi:10.1001/jamanetworkopen.2020.34890), 2021-01-27

## Supplemental Online Content

Ballreich JM, Gross CP, Powe NR, Anderson GF. Allocation of National Institutes of Health funding by disease category in 2008 and 2019. *JAMA Netw Open*. 4(1):e2034890. doi:10.1001/jamanetworkopen.2020.34890

**eTable 1.** US Burden of Disease 1996 and 2019 for 29 Diseases

**eTable 2.** NIH Funding 1996 and 2019

**eFigure 1.** Burden of Disease and NIH Funding 1996 and 2019

**eFigure 2.** Changes in Burden of Disease and NIH Funding (1996-2019)

**eTable 3.** Explaining 2019 NIH Funding Using Change in Disease Burden and 2008 NIH Funding

**eTable 4.** Explaining 2019 NIH Funding for 29 Diseases

**eFigure 3.** Correlation Between 2008 and 2019 Institutes and Centers Funding

This supplemental material has been provided by the authors to give readers additional information about their work.

**eTable 1.** U.S. Burden of Disease 1996 and 2019 for 29 Diseases

| Disease Category          | 1996 Burden (Proportion of total US DALYs) | 2019 Burden (Proportion of total US DALYs) | Change |
|---------------------------|--------------------------------------------|--------------------------------------------|--------|
| Total                     | 51.1%                                      | 45.3%                                      | -11.3% |
| Cardiovascular            | 11.5%                                      | 8.1%                                       | -29.5% |
| Ischemic Heart Disease    | 11.5%                                      | 8.1%                                       | -29.5% |
| Cancer                    | 9.2%                                       | 8.3%                                       | -10.3% |
| Lung Cancer               | 4.4%                                       | 3.8%                                       | -13.4% |
| Colon And Rectum Cancer   | 1.6%                                       | 1.6%                                       | -2.9%  |
| Breast Cancer             | 1.6%                                       | 1.3%                                       | -19.4% |
| Prostate Cancer           | 0.9%                                       | 0.8%                                       | -3.7%  |
| Ovarian Cancer            | 0.4%                                       | 0.4%                                       | -7.5%  |
| Cervical Cancer           | 0.2%                                       | 0.2%                                       | -10.1% |
| Uterine Cancer            | 0.2%                                       | 0.2%                                       | 43.7%  |
| Neurological              | 7.2%                                       | 7.1%                                       | -0.7%  |
| Stroke                    | 3.8%                                       | 3.5%                                       | -8.4%  |
| Alzheimer's And Dementias | 1.6%                                       | 1.8%                                       | 14.1%  |
| Schizophrenia             | 1.0%                                       | 0.9%                                       | -9.2%  |
| Epilepsy                  | 0.3%                                       | 0.3%                                       | -10.7% |
| Parkinson's Disease       | 0.3%                                       | 0.4%                                       | 47.4%  |
| Multiple Sclerosis        | 0.2%                                       | 0.2%                                       | 15.2%  |
| Other                     | 7.1%                                       | 5.2%                                       | -27.1% |
| Injuries                  | 3.9%                                       | 2.7%                                       | -32.4% |
| Neonatal Disorders        | 2.1%                                       | 1.4%                                       | -31.6% |
| Oral Disorders            | 1.1%                                       | 1.1%                                       | 1.1%   |
| Respiratory               | 6.2%                                       | 6.9%                                       | 12.3%  |
| COPD                      | 3.7%                                       | 4.5%                                       | 23.1%  |
| Pneumonia                 | 1.5%                                       | 1.1%                                       | -24.7% |
| Asthma                    | 1.0%                                       | 1.3%                                       | 27.2%  |
| Mental Health             | 3.6%                                       | 3.5%                                       | -2.6%  |
| Depressive Disorders      | 2.5%                                       | 2.4%                                       | -4.8%  |
| Alcohol Use Disorders     | 1.1%                                       | 1.1%                                       | 2.5%   |
| Endocrine                 | 2.6%                                       | 4.0%                                       | 52.9%  |
| Diabetes                  | 2.6%                                       | 4.0%                                       | 52.9%  |
| Infectious Diseases       | 2.2%                                       | 0.4%                                       | -79.6% |
| HIV/AIDS                  | 2.0%                                       | 0.4%                                       | -81.7% |
| STIs ex HIV               | 0.1%                                       | 0.0%                                       | -21.5% |
| Tuberculosis              | 0.1%                                       | 0.0%                                       | -56.6% |
| GI                        | 1.5%                                       | 1.7%                                       | 13.8%  |
| Cirrhosis                 | 1.4%                                       | 1.7%                                       | 21.5%  |
| Peptic Ulcer              | 0.2%                                       | 0.1%                                       | -45.4% |
| Sensory                   | 0.1%                                       | 0.0%                                       | -18.2% |
| Otitis Media              | 0.1%                                       | 0.0%                                       | -18.2% |

**eTable 2. NIH Funding 1996 and 2019**

| Disease Category          | 1996 NIH Spending (\$ millions)* | 2019 NIH Spending (\$ millions) | Change |
|---------------------------|----------------------------------|---------------------------------|--------|
| Total                     | \$9,750                          | \$15,616                        | 67%    |
| Infectious Diseases       | \$3,124                          | \$3,879                         | 24%    |
| HIV/AIDs                  | \$2,794                          | \$3,037                         | 9%     |
| STIs Ex HIV               | \$203                            | \$354                           | 74%    |
| Tuberculosis              | \$127                            | \$488                           | 284%   |
| Cancer                    | \$1,632                          | \$1,995                         | 22%    |
| Breast Cancer             | \$756                            | \$709                           | -6%    |
| Lung Cancer               | \$253                            | \$419                           | 66%    |
| Colon and Rectum Cancer   | \$209                            | \$294                           | 41%    |
| Prostate Cancer           | \$183                            | \$263                           | 43%    |
| Cervical Cancer           | \$119                            | \$106                           | -11%   |
| Ovarian Cancer            | \$83                             | \$168                           | 101%   |
| Uterine Cancer            | \$28                             | \$36                            | 30%    |
| Neurological              | \$1,487                          | \$3,534                         | 138%   |
| Alzheimer's And Dementias | \$603                            | \$2,398                         | 298%   |
| Stroke                    | \$238                            | \$350                           | 47%    |
| Schizophrenia             | \$221                            | \$263                           | 19%    |
| Multiple Sclerosis        | \$164                            | \$111                           | -32%   |
| Parkinson's Disease       | \$153                            | \$224                           | 47%    |
| Epilepsy                  | \$109                            | \$188                           | 72%    |
| Other                     | \$816                            | \$1,589                         | 95%    |
| Injuries                  | \$393                            | \$897                           | 128%   |
| Oral Disorders            | \$370                            | \$613                           | 65%    |
| Neonatal Disorders        | \$52                             | \$79                            | 51%    |
| Mental Health             | \$793                            | \$1,134                         | 43%    |
| Alcohol Use Disorders     | \$508                            | \$556                           | 9%     |
| Depressive Disorders      | \$285                            | \$578                           | 103%   |
| Endocrine                 | \$592                            | \$1,099                         | 86%    |
| Diabetes                  | \$592                            | \$1,099                         | 86%    |
| Cardiovascular            | \$533                            | \$1,443                         | 171%   |
| Ischemic Heart Disease    | \$533                            | \$1,443                         | 171%   |
| Respiratory               | \$408                            | \$571                           | 40%    |
| Asthma                    | \$162                            | \$313                           | 94%    |
| COPD                      | \$124                            | \$112                           | -9%    |
| Pneumonia                 | \$123                            | \$146                           | 19%    |
| GI                        | \$348                            | \$359                           | 3%     |
| Cirrhosis                 | \$336                            | \$351                           | 4%     |
| Peptic Ulcer              | \$12                             | \$8                             | -33%   |
| Sensory                   | \$18                             | \$13                            | -28%   |
| Otitis Media              | \$18                             | \$13                            | -28%   |

\*Adjusted to 2019 dollars

**eFigure 1. Burden of Disease and NIH Funding 1996 and 2019**

FIGURE S1A: NIH Funding and Burden of Disease (1996)

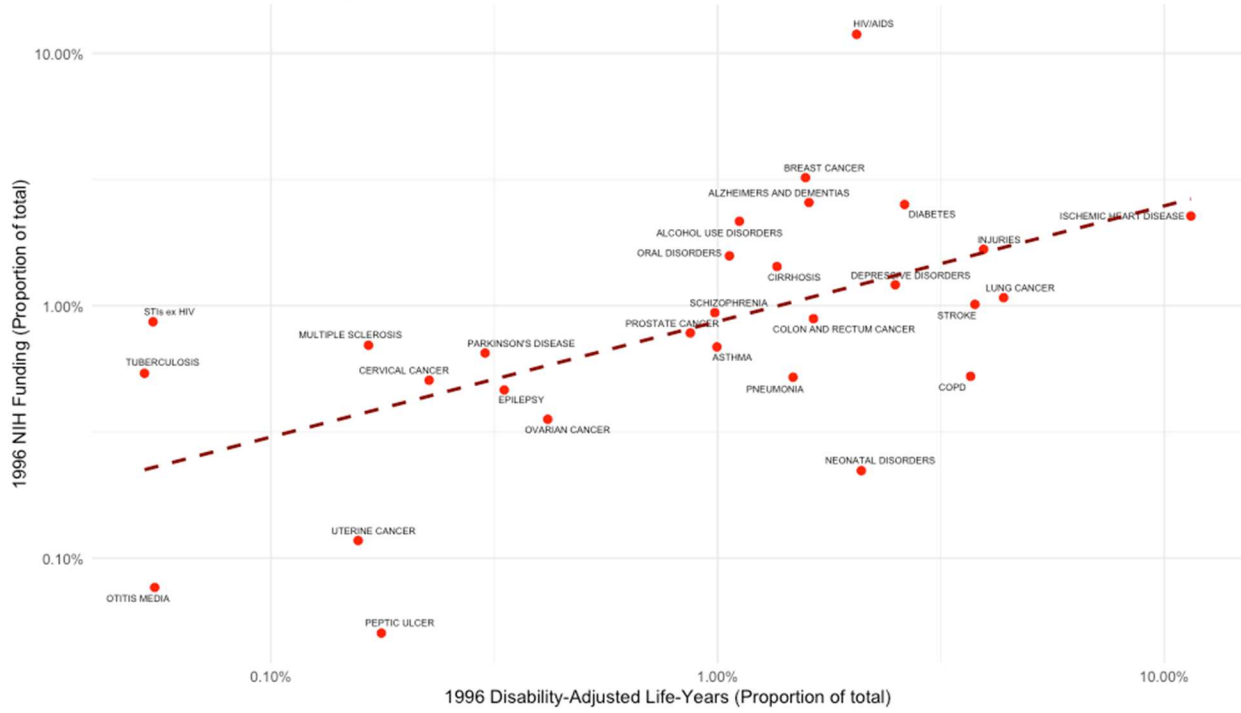

FIGURE S1B: NIH Funding and Burden of Disease (2019)

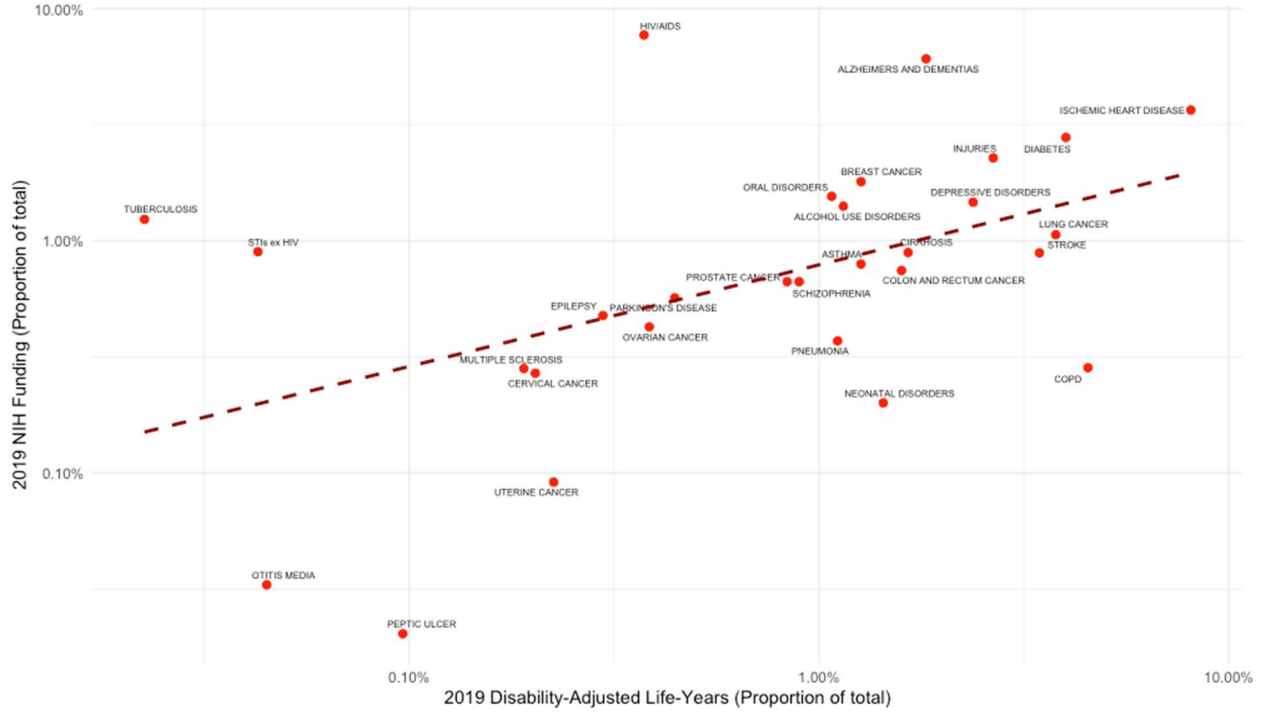

**eFigure 2.** Changes in Burden of Disease and NIH Funding (1996 - 2019)

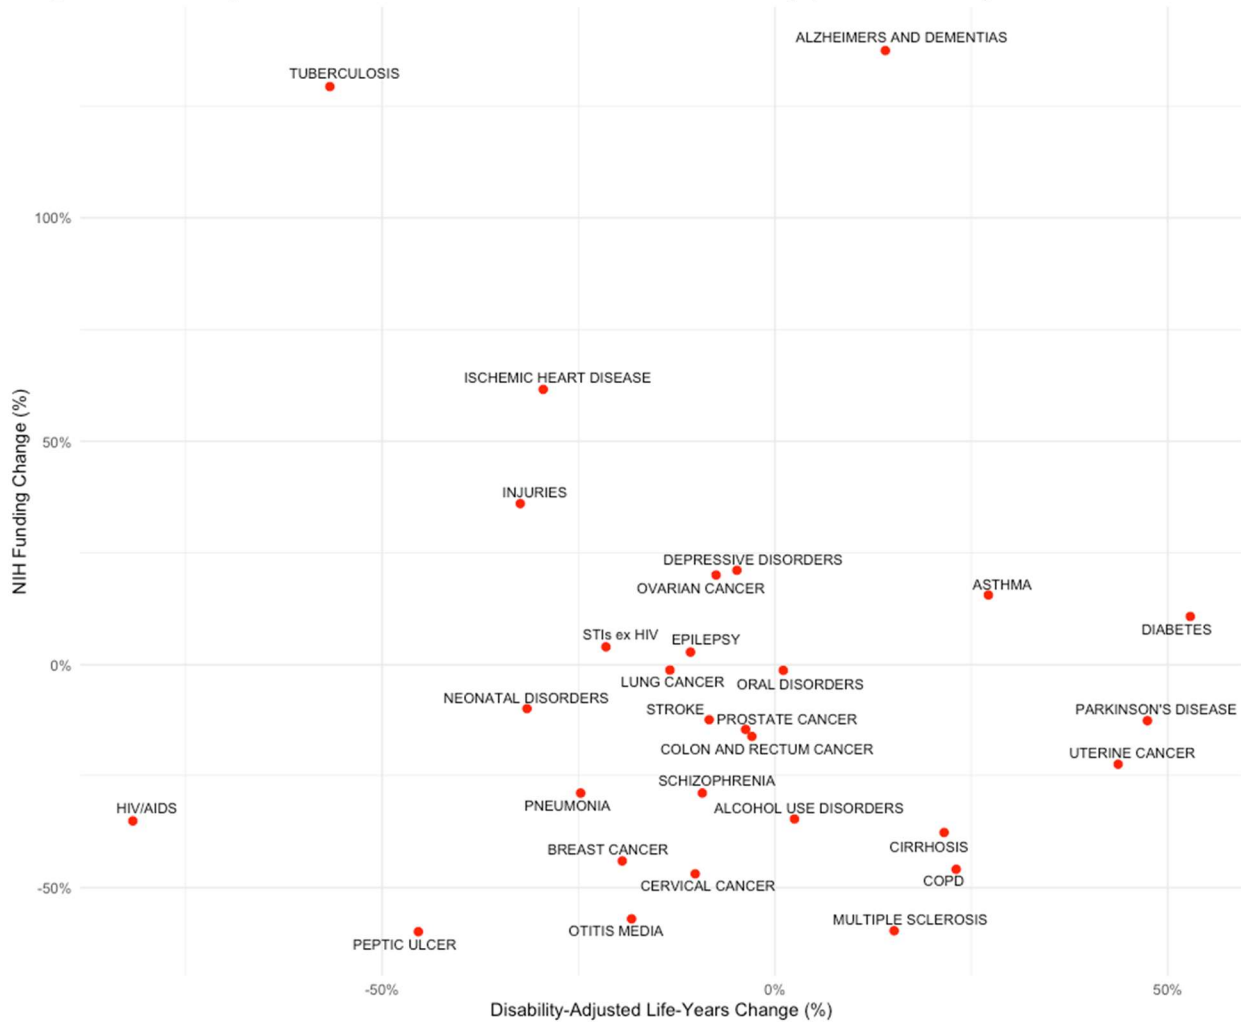

Linear OLS suggests  $R^2 < 0.01$  and coefficient of DALY to be not statistically significant ( $p \sim 0.81$ )

**eTable 3.** Explaining 2019 NIH Funding using change in Disease Burden and 2008 NIH Funding

|                  | (1)                  |
|------------------|----------------------|
| VARIABLES        | Model1               |
| 2008 NIH Funding | 0.946***<br>(0.0537) |
| Change in DALY   | 0.662<br>(0.439)     |
| Observations     | 46                   |
| R-squared        | 0.884                |

Standard errors in parentheses

\*\*\* p<0.01, \*\* p<0.05, \* p<0.1

**eTable 4.** Explaining 2019 NIH Funding for 29 Diseases

|                   | (1)                 | (2)                 | (3)                | (4)                 | (5)                 |
|-------------------|---------------------|---------------------|--------------------|---------------------|---------------------|
| VARIABLES         | Model1              | Model2              | Model3             | Model4              | Model5              |
| 2019 DALY         | 0.463***<br>(0.147) |                     |                    |                     | -0.0691<br>(0.309)  |
| 2008 DALY         |                     | 0.563***<br>(0.144) |                    |                     | 0.281<br>(0.332)    |
| 2016 Health Spend |                     |                     | 0.318**<br>(0.153) |                     | -0.133<br>(0.104)   |
| 2008 NIH Funding  |                     |                     |                    | 1.046***<br>(0.106) | 0.973***<br>(0.137) |
| Observations      | 29                  | 29                  | 29                 | 29                  | 29                  |
| R-squared         | 0.268               | 0.362               | 0.139              | 0.782               | 0.810               |

Standard errors in parentheses

\*\*\* p<0.01, \*\* p<0.05, \* p<0.1

Coefficients should be interpreted as elasticities. For example, in Model 1, the coefficient for 2019 DALYs should be interpreted as a 1% increase in 2019 DALYs yields a 0.463% in 2019 NIH Spending. Constants are excluded.

**eFigure 3.** Correlation between 2008 and 2019 Institutes and Centers Funding  
 NIH Institute and Center Funding 2008 to 2019

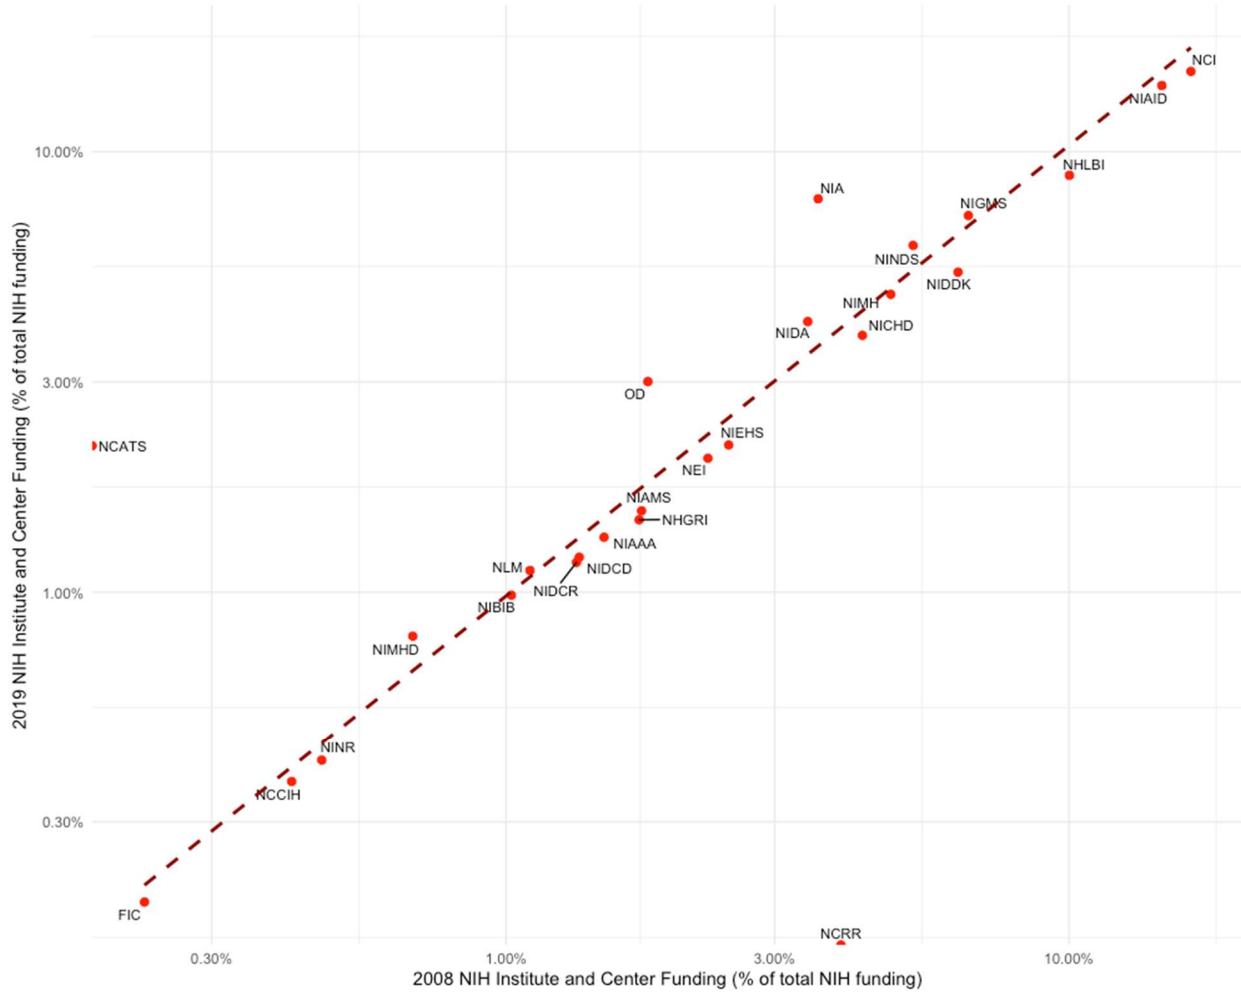

Supplement: jamanetwopen-e2034890-s001.pdf [file jamanetwopen-e2034890-s001.pdf]
